# Supplementary material for: Vascularized nanocomposite hydrogel mechanically reinforced by polyelectrolyte-modified nanoparticles
Source: Royal Society of Chemistry journal article supplement (doi:10.1039/d2tb00735e), 2022-01-01
Supplement: d2tb00735e1.pdf [file d2tb00735e1.pdf]

## Supporting Information

### **Vascularized nanocomposite hydrogel mechanically reinforced by polyelectrolyte-modified nanoparticles**

Qianqian Zhang<sup>1</sup>, Qingguo Pei<sup>2</sup>, Jin Yang<sup>1</sup>, Shuting Guo<sup>1</sup>, Ai Yang<sup>1</sup>, Yuhan Qian<sup>1</sup>, Chenglin Li<sup>1</sup>,  
Qian Feng<sup>1</sup>, Huijuan Lv<sup>1</sup>, Xiaojun Zhou<sup>1\*</sup> and Chuanglong He<sup>1\*</sup>

1 Shanghai Engineering Research Center of Nano-Biomaterials and Regenerative Medicine;  
College of Chemistry, Chemical Engineering and Biotechnology, Donghua University, Shanghai,  
China.

2 Department of Stomatology, Shanghai General Hospital, Shanghai Jiao Tong University School  
of Medicine, Shanghai, China

\*Corresponding author: Xiaojun Zhou, E-mail: [zxj@dhu.edu.cn](mailto:zxj@dhu.edu.cn); Chuanglong He, E-mail:  
[hcl@dhu.edu.cn](mailto:hcl@dhu.edu.cn).

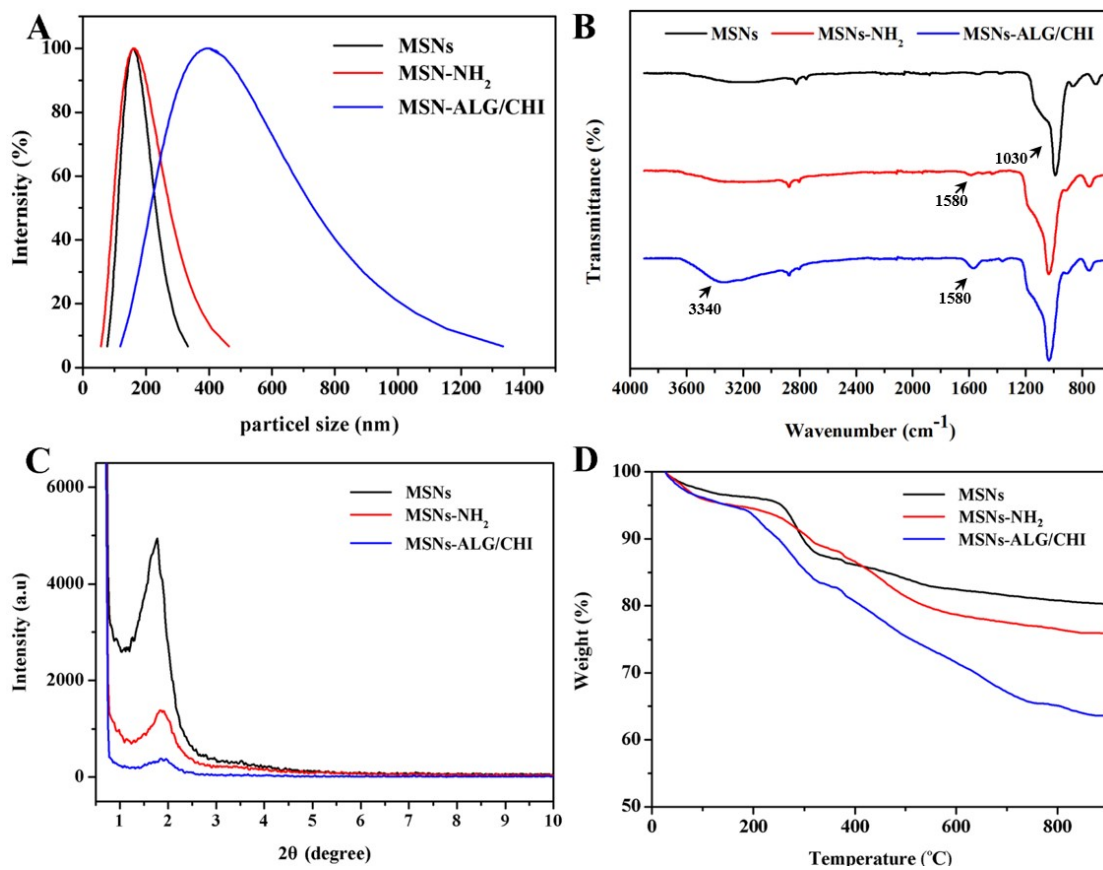

**Figure S1.** Characterization of the synthesized MSNs, MSNs-NH<sub>2</sub> and MSNs-ALG/CHI. (A) Curves of particle size distribution, (B) FTIR spectra, (C) XRD patterns, and (D) TGA curves.

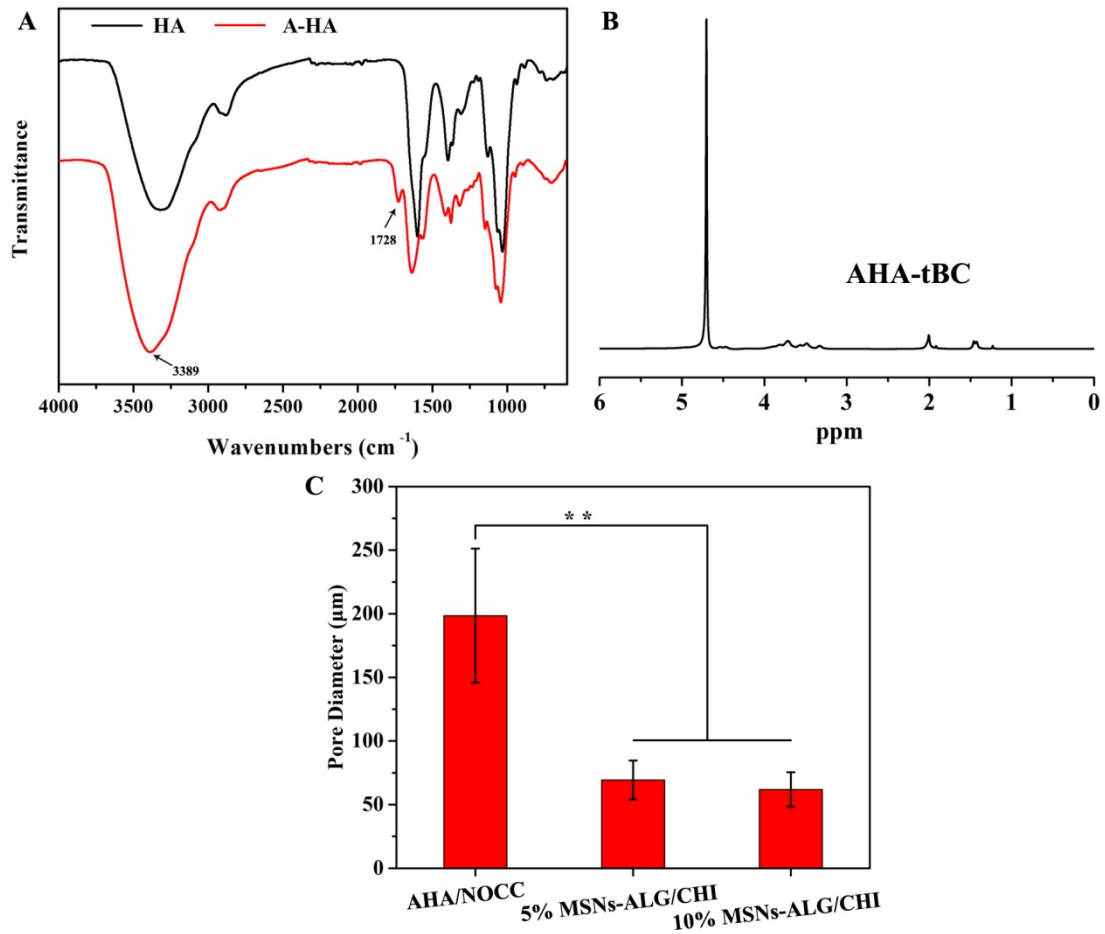

**Figure S2.** (A) FTIR spectra of HA and AHA, (B)  $^1\text{H}$  NMR spectra of AHA-tBC. (C) Pore size distribution of AHA/NOCC hydrogel, 5%MSNs/AHA/NOCC hydrogel and 10%MSNs/AHA/NOCC hydrogel (The pore size distribution of AHA/NOCC and nanocomposite hydrogels in each sample was quantitatively measured using ImageJ software,  $n = 100$ ).  $**p < 0.01$ .

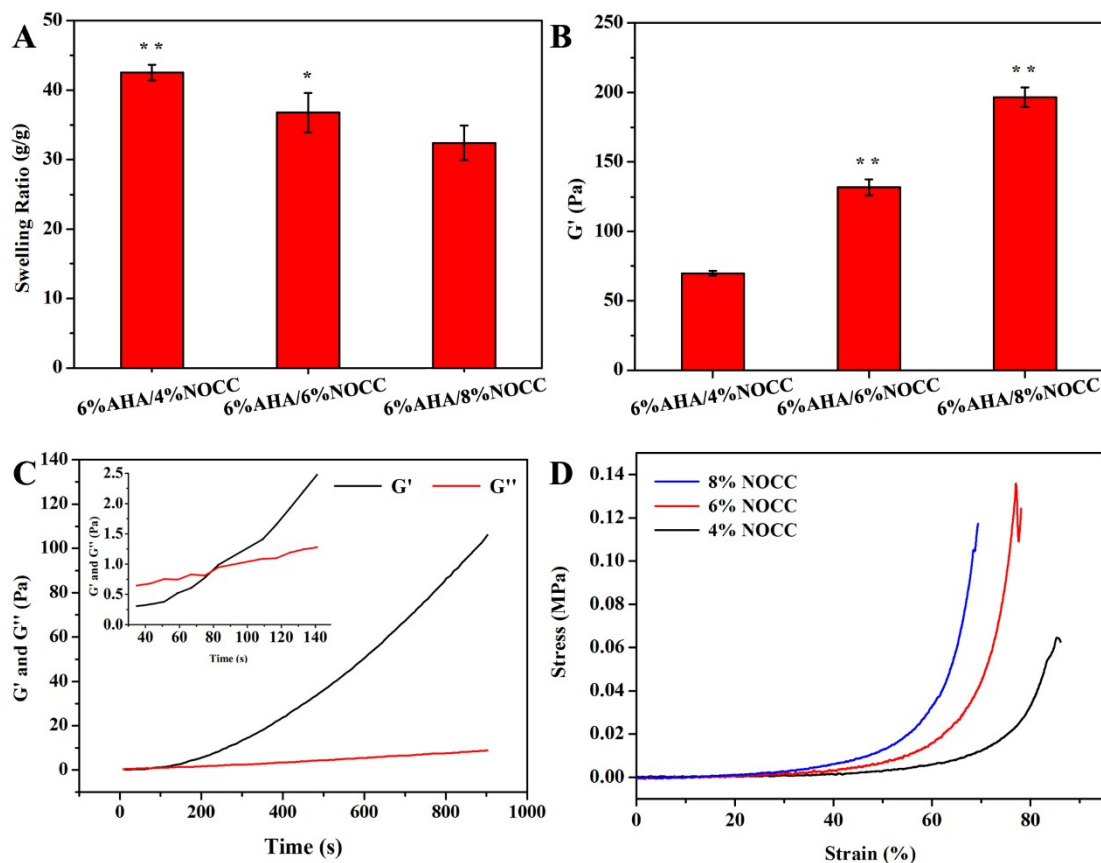

**Figure S3.** Characterization of hydrogels. (A) Swelling ratio of AHA/NOCC hydrogels prepared with different NOCC concentrations,  $*p < 0.05$ ,  $**p < 0.01$ , compared to 6%AHA/8%NOCC hydrogel. (B) Average  $G'$  of AHA/NOCC composites prepared with different NOCC concentrations,  $**p < 0.01$ , compared to 6%AHA/4%NOCC hydrogel. (C) Dynamic rheological test of 6%AHA/6%NOCC hydrogel. (D) Compression properties of AHA/NOCC hydrogels prepared with different NOCC concentrations.

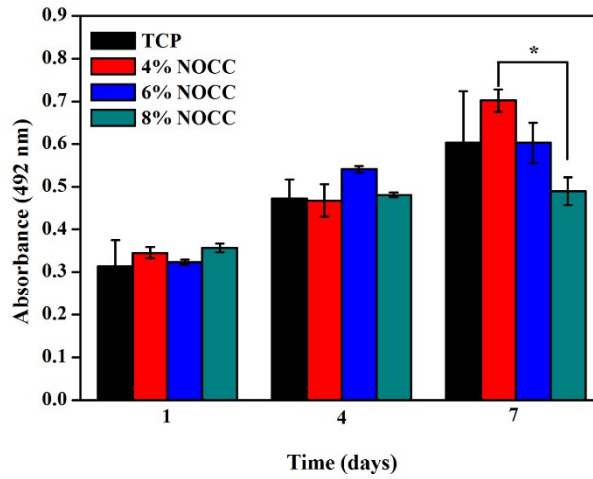

**Figure S4.** Cell proliferation of BMSCs cultured on the surface of AHA/NOCC hydrogels prepared with different NOCC concentrations and TCP for 1, 4, and 7 days. \* $p < 0.05$ .

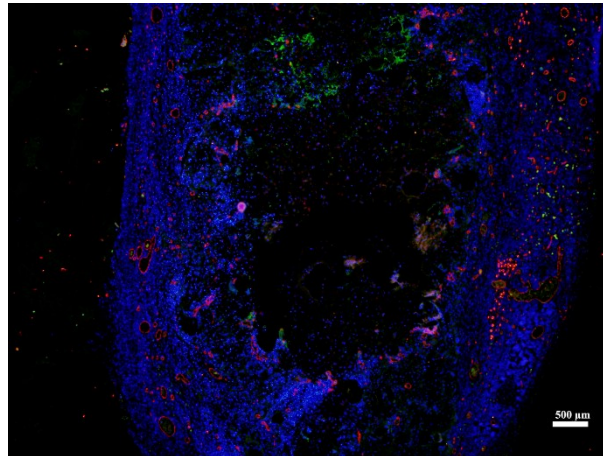

**Figure S5.** Immunofluorescence staining of CD31 (red) and vWF (green) expression after S1P-loaded nanocomposite hydrogels combined with macroporous scaffold (vertical section) implanted subcutaneously in mice for 3 weeks.
